# Supplementary material
Source: PubMed Central journal article supplement (PMC3283175)
Supplement: ejhg2011175x1.pdf [file ejhg2011175x1.pdf]

## SUPPLEMENTARY DATA

### Isolated NIBPL missense mutations that cause Cornelia de Lange syndrome alter MAU2 interaction.

Diana Braunholz<sup>1</sup>, Melanie Hullings<sup>2</sup>, María Concepcion Gil-Rodríguez<sup>1,3</sup>, Christopher Fincher<sup>2</sup>, Mark Mallozzi<sup>2</sup>, Elizabeth Loy<sup>2</sup>, Melanie Albrecht<sup>1</sup>, Maninder Kaur<sup>2</sup>, Janusz Limon<sup>4</sup>, Abhinav Rampuria<sup>2</sup>, Dinah Clark<sup>2</sup>, Antonie Kline<sup>5</sup>, Andreas Dalski<sup>1</sup>, Juliane Eckhold<sup>1</sup>, Andreas Tzschach<sup>6</sup>, Raoul Hennekam<sup>7</sup>, Gabriele Gillessen-Kaesbach<sup>1</sup>, Jolanta Wierzba<sup>8</sup>, Ian D. Krantz<sup>2,9</sup>, Matthew A. Deardorff<sup>2,9#</sup> and Frank J. Kaiser<sup>1</sup>

**Table S1: MAU2 polymorphisms identified**

| Gene | Nucleotide Change | Amino Acid Change | Location | refSNP ID  | Alleles Identified | Allele Frequency |
|------|-------------------|-------------------|----------|------------|--------------------|------------------|
| MAU2 | c.9_23del         | p.Gln4_Ala8del    | Exon 1   |            | 2/368              | 0.005            |
| MAU2 | c.301+19G>T       |                   | Intron 1 | rs12460764 | 40/368             | 0.109            |
| MAU2 | c.339G>A          |                   | Exon 3   | rs769267   | 241/368            | 0.655            |
| MAU2 | c.1200G>C         | synonymous        | Exon 4   |            | 1/368              | 0.003            |
| MAU2 | c.528G>T          |                   | Exon 5   | rs2074090  | 158/368            | 0.428            |
| MAU2 | c.774+33G>A       |                   | Intron 7 | rs2301668  | 13/368             | 0.035            |

**Table S2. Clinical Features of Patients with Mutations and Rare Variants in the NIBPL and MAU2 interaction regions**

| Patient info   | Patient ID                     | CDLLU1          | CDLAD6     | CDL252P            | CDLP737            | CDL225P                | CDL424P             | CDLP52       | CDL181P            | CDL046P                  | CDL383P                          |
|----------------|--------------------------------|-----------------|------------|--------------------|--------------------|------------------------|---------------------|--------------|--------------------|--------------------------|----------------------------------|
|                | Sex                            | M               | M          | F                  | M                  | M                      | M                   | F            | M                  | F                        | F                                |
|                | Gene                           | NIPBL           | NIPBL      | NIPBL              | NIPBL              | NIPBL                  | NIPBL               | NIPBL        | NIPBL              | MAU2                     | MAU2                             |
|                | Variant Type                   | missense        | missense   | missense           | missense           | missense               | missense            | missense     | missense           | in-frame deletion        | in-frame deletion                |
|                | cDNA mutation                  | c.43G>A         | c.86C>A    | c.332G>C           | c.535G>T           | c.535G>A               | c.535G>A            | c.737A>G     | c.760C>G           | c.9_23del                | c.9_23del                        |
|                | Protein effect                 | p.Gly15Arg      | p.Pro29Gln | p.Ser111Thr        | p.Ala179Ser        | p.Ala179Thr            | p.Ala179Thr         | p.Asp246Gly  | p.Leu254Val        | p.del5                   | p.del5                           |
| Mutation notes |                                |                 |            |                    |                    |                        |                     |              |                    | in unaffected mother     | also with 5.1MB deletion on 2q23 |
| HEAD           | Brachycephaly                  | microbrachy     |            | 1                  | microbrachycephaly | +                      | -                   | microcephaly | -                  | +                        | -                                |
|                | Low anterior hairline          |                 | +          | 1                  | +                  | +                      | -                   | +            | +                  | +                        | +                                |
| FACE           |                                | typical         | mild       | classic            | typical            | typical                | classic             | classic      | mild               | classic                  | atypical                         |
| Eyes           | Arched eyebrows                | +               |            | +                  | +                  | +                      | +                   | +            | +                  | +                        | full                             |
|                | Synophrys                      |                 | +          | +                  | +                  | +                      | +                   | +            | +                  | +                        | +                                |
|                | Long eyelashes                 | +               | +          | +                  | +                  | +                      | +                   | +            | +                  | +                        | -                                |
|                | Ptosis                         |                 |            | -                  | -                  | +                      | +                   | -            | +                  |                          | -                                |
| Nose           | depressed nasal bridge         | +               | -          | +                  | +                  | +                      | +                   | +            | +                  | +                        | +                                |
|                | Anteverted nostrils            | +               | +          | +                  | +                  | +                      | +                   | -            | +                  | +                        | +                                |
|                | Long/featureless philtrum      | +               | +          | +                  | +                  | +                      | +                   | -            | +                  | +                        | -                                |
| Mouth          | Thin upper lip                 | +               | +          | +                  | +                  | +                      | +                   | +            | +                  | +                        | +                                |
|                | Downturned corners of mouth    | -               | +          | +                  | +                  | +                      | +                   | +            | +                  | +                        | -                                |
|                | Palate - high arch             | -               | -          | +                  | +                  | -                      |                     | +            | +                  |                          | +                                |
|                | Palate - cleft                 | -               |            | -                  | -                  | +                      |                     | -            | -                  |                          | -                                |
|                | Teeth (small, widely spaced)   | +               | +          | widely spaced      | +                  | hypertrophic gums      | -                   | +            | +                  | +                        | -                                |
|                | Micrognathia                   | +               | -          | -                  | +                  | +                      | -                   | +            | +                  | +                        | -                                |
| Skin           | Cutis marmorata                | -               | +          | +                  | -                  | -                      | +                   | -            | +                  | +                        | -                                |
|                | Hirsutism                      | -               | +          | +                  | -                  | +                      | -                   | -            | +                  | +                        | +                                |
| Hands          | Small hands                    | +               | +          | +                  |                    | -                      | -                   | -            | +                  | +                        | +                                |
|                | Proximally set thumbs          | +               |            | +                  |                    | +                      | +                   | -            | +                  | +                        | +                                |
|                | Clinodactyly 5th finger        | +               | +          | +                  | +                  | -                      | +                   | +            | +                  | +                        | -                                |
|                | Single Palmar crease           | -               | +          | +                  | -                  |                        |                     | +            | + L                | -                        |                                  |
| Feet           | Small feet                     |                 | +          | +                  | +                  | +, Rocker bottom       |                     | +            | +                  | +                        | +                                |
|                | 2,3 Syndactyly of toes         | -               | -          | +                  | -                  | +                      | -                   | -            | +                  | -                        | +                                |
| Arms           | Restriction of elbow movements | -               | +          | +                  | +                  |                        |                     | +            | -                  | +                        | +                                |
| CARDIAC        | Cardiac defects                | -               | -          | aortic coarctation | -                  | PS, ASD, mitral regurg | Tetralogy of Fallot | PDA          | -                  | ASD closed spontaneously | -                                |
| GENITOURINARY  | Genitourinary defects          | cryptorchidism, | -          | -                  | -                  | -                      | -                   | -            | + testes descended | -                        | spina bifida                     |

|                   |                             |                   |       |             |                 |           |                     |                                                |                                                          |                  |                                                    |
|-------------------|-----------------------------|-------------------|-------|-------------|-----------------|-----------|---------------------|------------------------------------------------|----------------------------------------------------------|------------------|----------------------------------------------------|
|                   |                             | hypospadias       |       |             |                 |           |                     |                                                | once walked                                              |                  |                                                    |
| GASTROENTEROLOGY  | GER                         |                   | -     | +           | +               | +         | +                   | +                                              | +                                                        | +                | -                                                  |
|                   | Feeding problems in infancy | +                 |       | -           | +               | +         | +, pyloric stenosis | +                                              | +                                                        | +                | malrotation                                        |
| OTOLOGY           | Hearing loss                | choanal atresia + | -     | -           | -               |           |                     | -                                              | - loss; tubes 3x                                         | +                | hyperacusis                                        |
| OPHTHALMOLOGY     | Eye problems                | Hyperopia         | +     | -           | -               |           |                     | -                                              | +                                                        | ptosis           | astigmatism                                        |
|                   | Myopia                      | -                 | +     | -           | +               |           |                     | +                                              | + lacrimal duct obst @birth                              | +                |                                                    |
| CNS               | CNS anomalies               | -                 | -     | -           | -               |           |                     | -                                              | -                                                        | -                | -                                                  |
|                   | Seizures                    | -                 | -     | -           | -               | infantile |                     | -                                              | moderate                                                 | febrile          | +                                                  |
| COGNITIVE         | Mental Retardation          | severe            | mild  | very mild   | mild            |           | moderate            | severe                                         | energetic and curious about surroundings ; quiet on exam | moderate         | moderate-severe MR                                 |
|                   | Behavior                    |                   |       | normal      | hyperactivity   |           | self-injurious      | hyperactivity , autistic-like,                 |                                                          | temper tantrums  | mild SIB, aggression, high pain tolerance, anxiety |
| DEVELOPMENT       | Verbal development          | few words         |       | near normal | mild, sentences |           | marked delay        | minimal speech uses some syllables nonspecific | minimal speech at 17 mo; uses "mama" - nonspecific       | few words at 9 y |                                                    |
|                   | Motor development           | Walked at 7 mo    |       | near normal | mild            |           | walked at 4.5 y     | moderate                                       | walked at 2 y                                            | walked at 40 mo  | walked at 5.5 y                                    |
| MEASUREMENTS      | Gestational age (wks)       | 36                | 41    | 40          | 38              | 31        | 40                  | 39                                             | 40                                                       | 38               | 40                                                 |
| Birth             | BW (gm)                     | 1760              | 3100  | 2784        | 1700            | 1984      | 2840                | 1700                                           | 3543                                                     | 2700             | 2600                                               |
|                   | %ile weight (reg chart)     | <10%              | 40%   | 15%         | <5%             | 90%       | 25%                 | <<10%                                          | 75%                                                      | 75%              | 10%                                                |
|                   | Length at birth             | 42 cm             | 48 cm | 45.7 cm     | 46 cm           | 44 cm     | 45.72cm             | 46 cm                                          | 19.25 in                                                 | 45.7 cm          | 48cm                                               |
|                   | %ile length (reg chart)     | <10%              | 40%   | 10%         | 20%             | 75-90%    | 10%                 | 10%                                            | 50%                                                      | 75%              | 25%                                                |
|                   | Head circumference at birth |                   |       |             | 29 cm           | 30.7 cm   |                     | 31 cm                                          | 13.25 in                                                 | 31 cm            | 30.5 cm                                            |
|                   | %ile HC (reg chart)         |                   |       |             | <10%            | 75-90%    |                     | <<10%                                          | 25-50%                                                   | 50%              | <<10%                                              |
|                   | APGAR score (1min/5min)     | ?                 |       | 9/9         | 10              | 5/7       |                     | 10/10                                          | 6/9                                                      |                  |                                                    |
| Later evaluations | Age at evaluation           | 7.5 y             | 14 y  | 9 y         | 14 y            | 5 mo      | 9 y                 | 28 y                                           | 3 y                                                      | 9 y              | 23 y                                               |
|                   | Weight (kg)                 | 12                |       | 20.8        | 42              | 4.6       | 19.8                | 36.4                                           | 10.45                                                    |                  | 68.6                                               |
|                   | %ile weight (reg chart)     | <5%               |       | <5%         | 10%             | <5%, 50%  | <5%                 | <5, 50% for                                    | <5%, 50%                                                 |                  | 80%                                                |

|  |                          |      |       |       |     |          |       |                  |                    |  |                   |
|--|--------------------------|------|-------|-------|-----|----------|-------|------------------|--------------------|--|-------------------|
|  |                          |      |       |       |     | for 1 mo |       | 11 y             | for 12 mo          |  |                   |
|  | %ile weight (CdLS chart) |      |       | 95%   | 95% | 50-95%   | 60%   | 60%              | ~ 95%              |  | >95%              |
|  | Height (cm)              | 98   | 150.1 | 119   | 146 |          | 116.4 | 142              | 82.5               |  | 144.5             |
|  | %ile height (reg chart)  | <5%  |       | <5%   | <5% |          | <5%   | <5; 50% for 10 y | <5%, 50% for 18 mo |  | <5%, 50% for 11 y |
|  | %ile height (CdLS chart) | 40%  | 90%   | 80%   | 95% |          | 70%   | 5%               | 70%                |  | 75%               |
|  | Head circumference       | 43.5 | 50.8  | 48.25 | 49  |          |       | 51               | 46.75              |  | 48.5              |
|  | %ile HC (reg chart)      | < 3% |       | <5%   | <3% |          |       | <3; 50% for 4 y  | <5%, 50% for 13 mo |  | <2%               |
|  | %ile HC (CdLS chart)     |      | 60%   | 98%   | 60% |          |       | 90%              | 75%                |  |                   |

No notation indicates that information is unavailable. Numbering is based on *NIPBL* and *MAU2* cDNA sequences from the first nucleotide of the open reading frame (RefSeq accession numbers NM\_015384 and NM\_015329, respectively). Nomenclature is per den Dunnen (2000). Abbreviations included: PS, pulmonic stenosis; ASD, atrial septal defect; MR, mental retardation; SIB, self-injurious behavior;
